# Supplementary material
Source: ML conference proceedings conference paper supplement (https://openaccess.thecvf.com/content/ICCV2023/html/Parger_MotionDeltaCNN_Sparse_CNN_ICCV_2023_paper.html)
Supplement: Supplementary file 1 [file Parger_MotionDeltaCNN_Sparse_CNN_ICCV_2023_supplemental.zip]

Archive with 2 entries (2 files):
- method_and_results.mp4
- supplementary_material.pdf
